# Supplementary material for: Sensitive fluorescence detection of lysozyme using a tris(bipyridine)ruthenium(ii) complex containing multiple cyclodextrins
Source: Royal Society of Chemistry journal article supplement (doi:10.1039/c5cc00428d), 2015-01-01
Supplement: c5cc00428d1.pdf [file c5cc00428d1.pdf]

1

*Supporting Information*

2

Sensitive fluorescence detection of lysozyme

3

using a tris(bipyridine)ruthenium(II) complex

4

containing multiple cyclodextrins

5

Fan Zhang, Ying-Ying Zhao, Hong Chen, Xiu-Hua Wang, Qiong Chen and Pin-Gang He\*

6

*Department of Chemistry, East China Normal University, Shanghai 200241, P. R. China*

7

8

## 9 **Experimental Section:**

### 10 **Apparatus**

11 Fluorescence was recorded on a F-7000 FL instrument (Hitachi High-Technologies  
12 Co., Japan).

### 13 **Chemicals and Materials**

14 Lysozyme, thrombin, bovine serum albumin (BSA) and human immunoglobulin G  
15 (IgG) were obtained from Dingguo Biotechnology Inc. (Beijing, China). Adamantane  
16 and acetonitrile were obtained from Sinopharm Chemical Reagent Co., Ltd (Shanghai,  
17 China). The sequence of the ssDNA (lysozyme-aptamer), 5'-ATC AGG GCT AAA  
18 GAG TGC AGA GTT ACT TAG-3', was purchased from Sangon Biotech Co., Ltd.  
19 (Shanghai, China) and dissolved in deionized water. Adamantane solutions were  
20 prepared in acetonitrile. Deionized water ( $> 18.3 \text{ M}\Omega\cdot\text{cm}$ ) was produced from a  
21 Millipore Milli-Q water purification system.

### 22 **Fluorescence performances of metallocyclodextrins with ssDNA**

23 All of the metallocyclodextrin solutions were prepared in deionized water. The  
24 fluorescence determination for the impact of ssDNA on metallocyclodextrins was as  
25 follows: metallocyclodextrins and equal ssDNA were incubated for 2 h before the  
26 measurement. Fluorescence spectra were measured at 25 °C with excitation  
27 wavelength of 450 nm and slit width of 10 nm (Unless stated, the parameters of  
28 fluorescence spectra are consistent).

### 29 **Fluorescence performances of the addition of ssDNA into the mixture of** 30 **metallocyclodextrins and adamantane**

31 Fluorescence spectra of the mixed solution containing metallocyclodextrins and  
32 adamantane incubated for 2 h were carried out at 25 °C with an excitation wavelength  
33 of 450 nm. An equal amount of ssDNA was added to each of the mixed solutions and  
34 incubated at 37 °C for 2 h, and the fluorescence measurement was investigated at the  
35 same experimental conditions.

#### 36 **Job-plot for the complex stoichiometry analysis**

37 The total concentration of 6CD-Ru and ssDNA was kept constant during the  
38 experiment ( $1 \times 10^{-5}$  M) of each compound in different ratios. The mixture was  
39 incubated at 37 °C for 2 h before the fluorescence measurement. The solution of 6CD-  
40 Ru of the same concentration without ssDNA was also prepared and measured.

#### 41 **Detection of lysozyme**

42 For the quantitative detection, lysozyme at various concentrations was incubated in  
43 the binding buffer (0.56 mM Tris-HCl, 4.7 mM NaCl and 0.14 mM KCl, pH=6.5)  
44 containing 0.5  $\mu$ M 6CD-Ru and 0.5  $\mu$ M lysozyme-aptamer at 37 °C for 2 h. The  
45 fluorescence behavior was then monitored.

46 The selectivity of the aptasensing was investigated by repeating the experiment  
47 under the same conditions and using some typical interference proteins (100 nM),  
48 including thrombin, BSA and IgG.

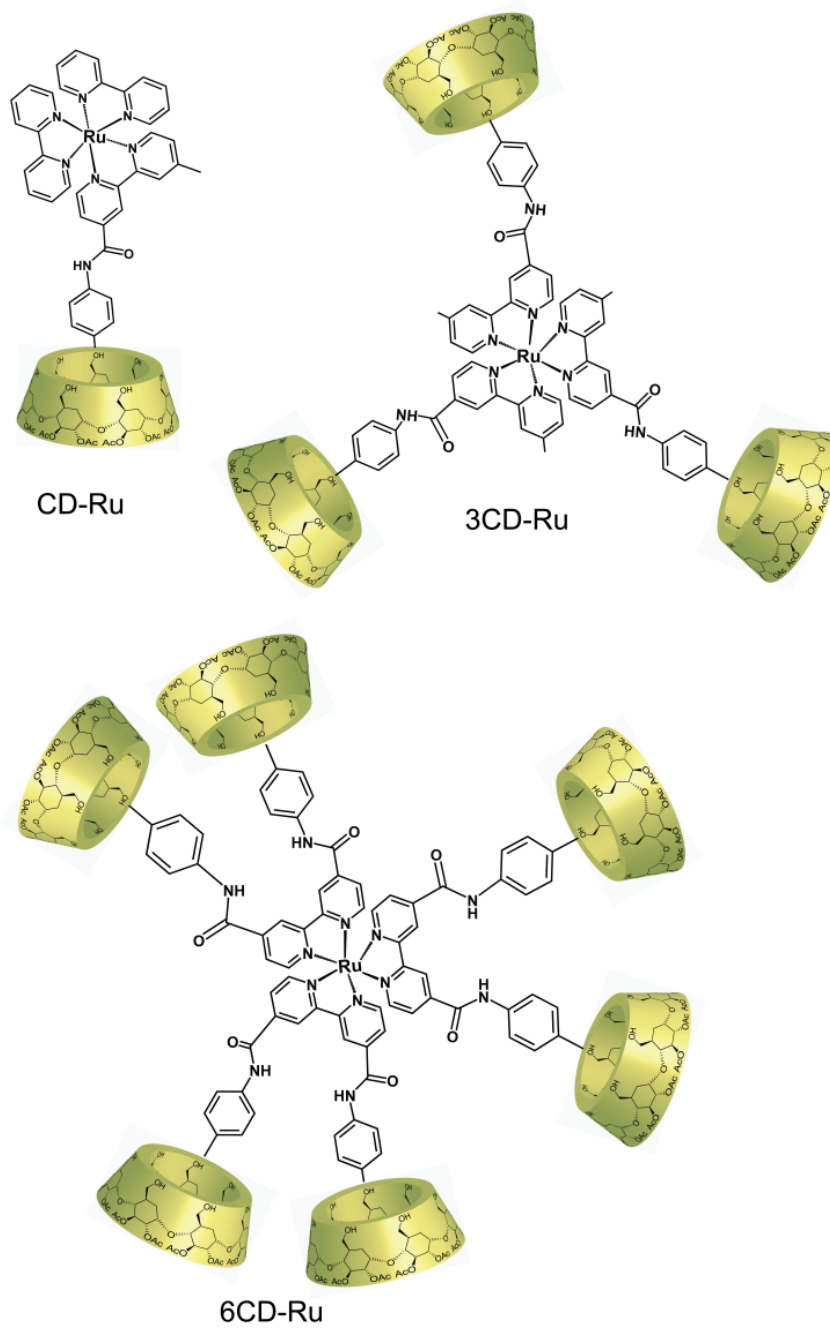

49

50 **Fig. S1** Structures of the new series of metallocyclodextrins including CD-Ru, 3CD-  
51 Ru and 6CD-Ru.<sup>1</sup>

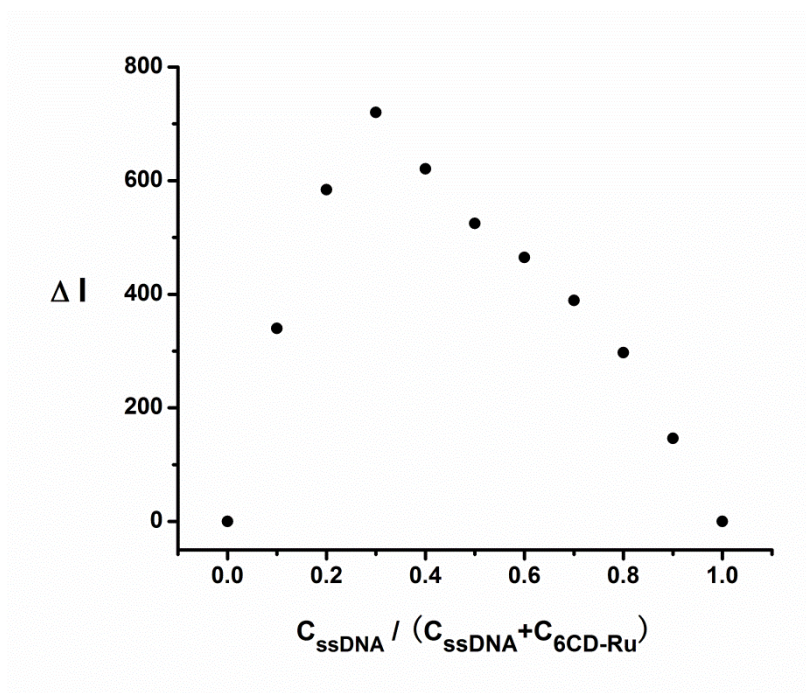

53

54 **Fig. S2** Job-plot for the binding of ssDNA/aptamer and 6CD-Ru in the aqueous  
55 solution. The total concentration of 6CD-Ru and ssDNA/aptamer was kept constant  
56 ( $1 \times 10^{-5}$  M) during the experiments for each compound in different ratios.  $\Delta I$  is the  
57 difference between the measured emission intensity and the intensity for the solution  
58 of 6CD-Ru for the same concentration without ssDNA/aptamer.

59

60

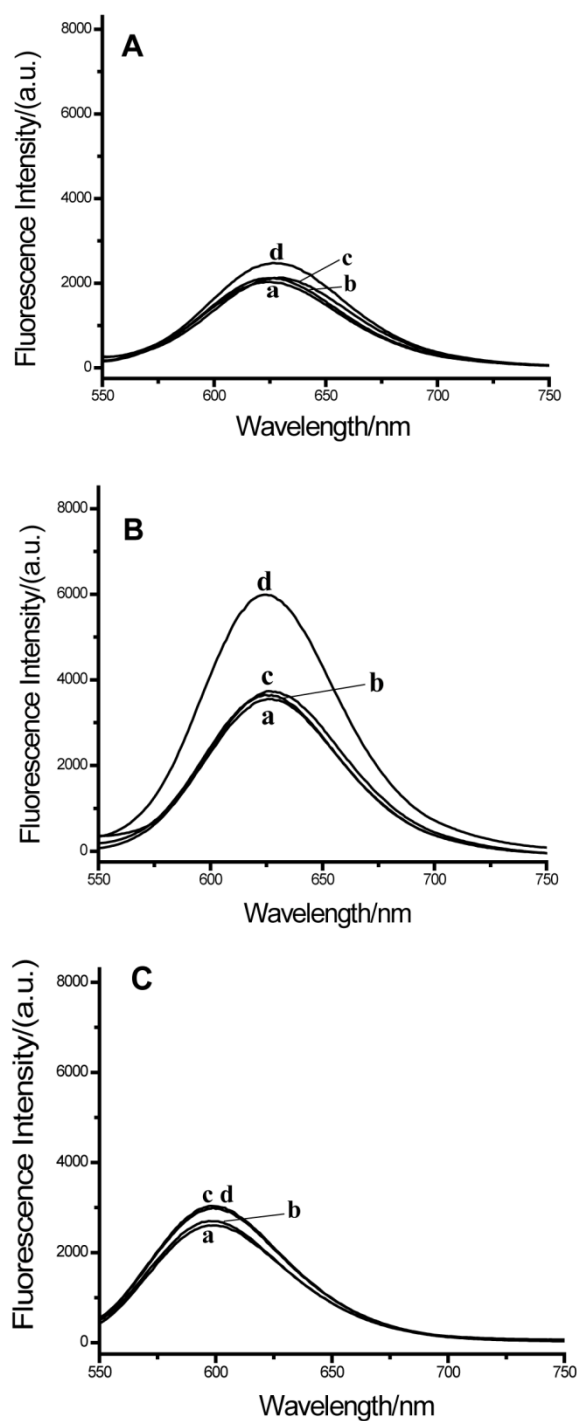

61

62 **Fig. S3** Fluorescence spectra of (A): (a) 5  $\mu\text{M}$  CD-Ru, (b) 5  $\mu\text{M}$  CD-Ru with 5  $\mu\text{M}$   
 63 adamantane, (c) 5  $\mu\text{M}$  CD-Ru with 5  $\mu\text{M}$  adamantane and 5  $\mu\text{M}$  ssDNA, (d) 5  $\mu\text{M}$   
 64 CD-Ru with 5  $\mu\text{M}$  ssDNA; (B): (a) 5  $\mu\text{M}$  3CD-Ru, (b) 5  $\mu\text{M}$  3CD-Ru with 15  $\mu\text{M}$   
 65 adamantane, (c) 5  $\mu\text{M}$  3CD-Ru with 15  $\mu\text{M}$  adamantane and 5  $\mu\text{M}$  ssDNA, (d) 5  $\mu\text{M}$   
 66 3CD-Ru with 5  $\mu\text{M}$  ssDNA; (C): (a) 5  $\mu\text{M}$  Ru(bpy)<sub>3</sub><sup>2+</sup>, (b) 5  $\mu\text{M}$  Ru(bpy)<sub>3</sub><sup>2+</sup> with 5  $\mu\text{M}$   
 67 adamantane, (c) 5  $\mu\text{M}$  Ru(bpy)<sub>3</sub><sup>2+</sup> with 5  $\mu\text{M}$  adamantane and 5  $\mu\text{M}$  ssDNA, (d) 5  $\mu\text{M}$   
 68 Ru(bpy)<sub>3</sub><sup>2+</sup> with 5  $\mu\text{M}$  ssDNA

69

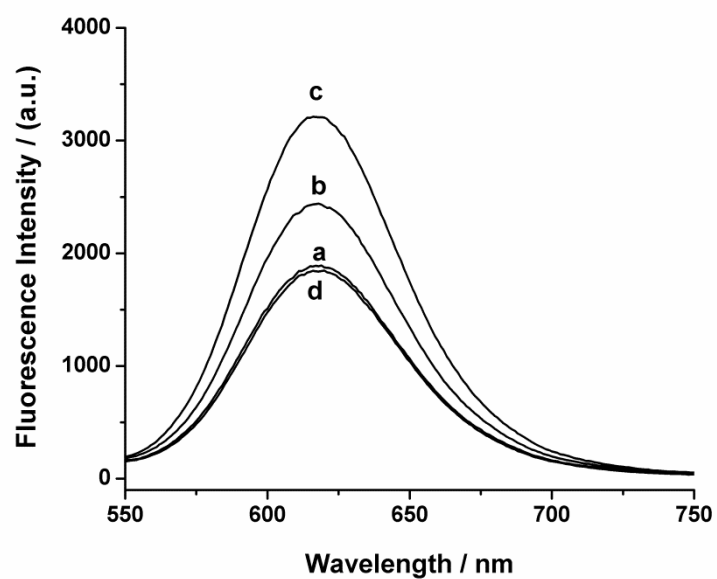

70

71 **Fig. S4** Fluorescence spectra of (a) 0.5  $\mu\text{M}$  6CD-Ru; (b) 0.5  $\mu\text{M}$  6CD-Ru with 0.5  
72  $\mu\text{M}$  lysozyme-aptamer and 50 nM lysozyme; (c) 0.5  $\mu\text{M}$  6CD-Ru with 0.5  $\mu\text{M}$   
73 lysozyme-aptamer; (d) 0.5  $\mu\text{M}$  6CD-Ru with 0.5  $\mu\text{M}$  lysozyme.

74

76 **Reference**

- 77 1 Y. T. Qi, X. H. Wang, H. Chen, J. Tang, F. Yang and P. G. He, *Supramolecular*  
78 *Chemistry*, 2015, **27**, 44-51.
